# Supplementary material for: Comprehensive Identification of Krüppel-Like Factor Family Members Contributing to the Self-Renewal of Mouse Embryonic Stem Cells and Cellular Reprogramming
Source: PubMed Central journal article supplement (PMC4778944; doi:10.1371/journal.pone.0150715), 2016-03-04
Supplement: pone.0150715.s003.pdf [file pone.0150715.s003.pdf]

**Table S1: List of qRT-PCR primer sequences**

| <b>Gene</b>    | <b>Primer Sequence (Forward)</b> | <b>Primer Sequence (Reverse)</b> |
|----------------|----------------------------------|----------------------------------|
| Oct3/4         | TATTGAGTATTCCCAACGAGAAGAG        | CTCAGGAAAAGGGACTGAGTAGAGT        |
| Nanog          | CTTTCACCTATTAAGGTGCTTGC          | TGGCATCGGTTTCATCATGGTAC          |
| Sox2           | CATGAGAGCAAGTACTGGCAAG           | CCAACGATATCAACCTGCATGG           |
| Klf2           | TCGAGGCTAGATGCCTTGTGA            | AAACGAAGCAGGCGGCAGA              |
| Klf4           | TACCCCTACACTGAGTCCCG             | GGAAAGGAGGGTAGTTGGGC             |
| Klf5           | CGATTCACAACCCAAATTTACC           | GTATGAGTCCTCAGGTGAGCTTTTA        |
| Esrrb          | ATGAATGTGAGATCACCAAACG           | G TTCAGGTAGGGGCTGTTCTC           |
| Fgf5           | ACCCACTTCCTACCCAGGTT             | AGTTGTTTCCCACAAGGCCA             |
| T (Brachyury)  | CATG TACTCTTTCTTGCTGGACTTC       | GAGCTTGTTGGTGAGTTTGACTTT         |
| Stella         | AGGCTCGAAGGAAATGAGTTTG           | TCCTAATTCTTCCCGATTTTCG           |
| Rex1           | TCCATGGCATAGTTCCAACAG            | TA ACTGATTTTCTGCCGTATGC          |
| $\beta$ -actin | CTGAGCGCAAGTACTCTGTGTG           | GTGTAAAACGCAGCTCAGTAACAGT        |
